# Supplementary material
Source: PubMed Central journal article supplement (PMC4682306)
Supplement: supp_tpc.15.00679_TPC2015-00679-RAR1_Supplemental_FiguresRev.pdf [file supp_tpc.15.00679_TPC2015-00679-RAR1_Supplemental_FiguresRev.pdf]

**Supplemental Figure 1** Positional cloning of *sts1*

(A) Bulk-segregant mapping of *sts1* identified linkage to the SSR marker *umc1266*, which is tightly linked to *Zmm16* on chromosome 3.

(B) Gene structure of *sts1* (*Zmm16*), showing the splice site mutations in two independent mutant *sts1* alleles.

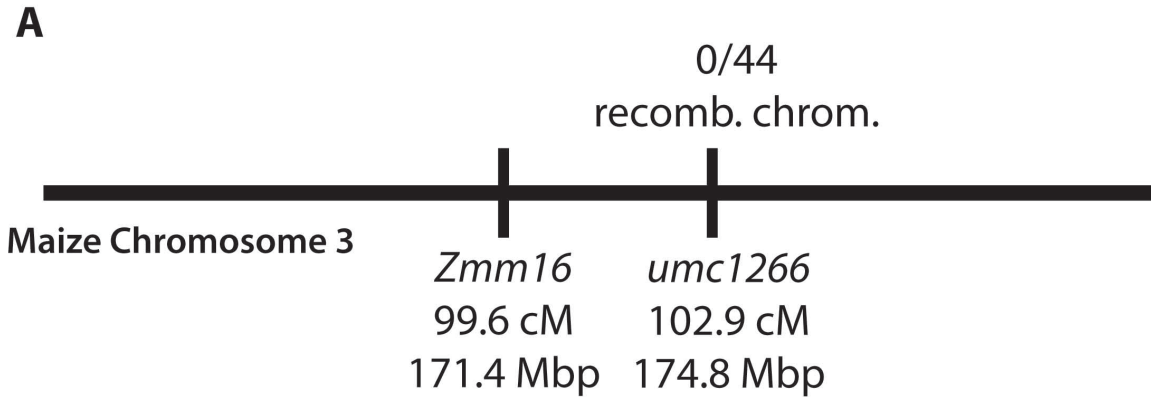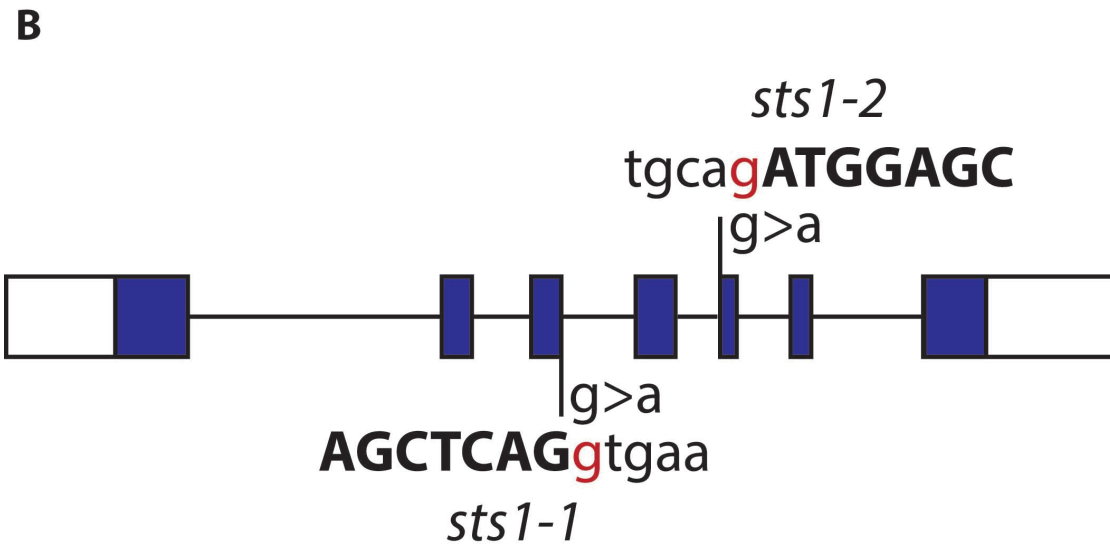

**Supplemental Figure 2** Complementation of *sts1-1* by *Zmm16-YFP*

(A) *sts1-1* homozygote lacking *Zmm16-YFP* transgene

(B) *sts1-1* homozygote with *Zmm16-YFP* transgene shows complete rescue of the floral phenotype.

P = Palea, Le = lemma, TSt = transformed stamen, TL = transformed lodicule, St = stamen

Table shows the number of wild-type and *sts1* mutant flowers. All plants were F2 progeny of a cross between *sts1* mutant x *Zmm16-YFP* transgenic plants. Progeny were genotyped for the *sts1-1* locus as described in the materials and methods, and presence of *Zmm16-YFP* determined by scoring for BASTA resistance.

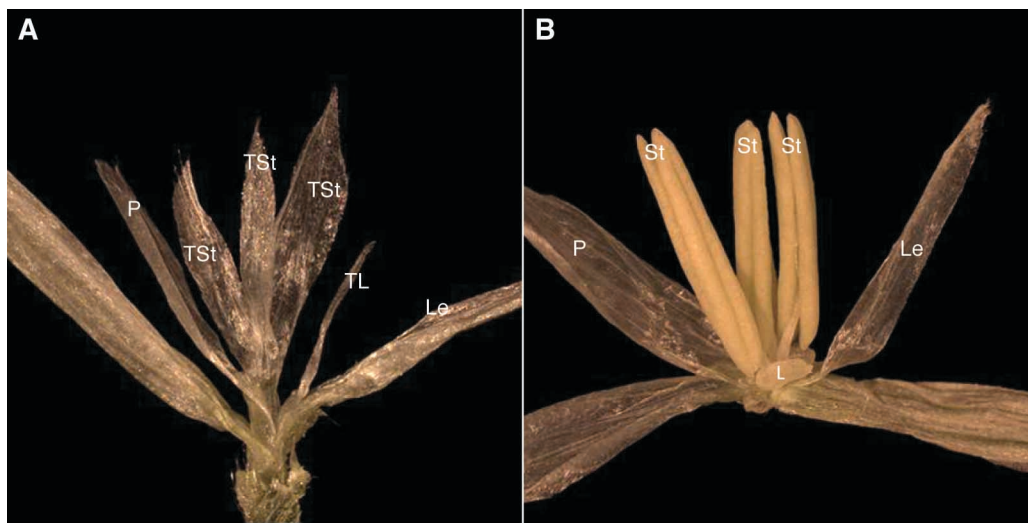

| <i>sts1</i> Genotype | <i>Zmm16-YFP</i> | Phenotype |             |
|----------------------|------------------|-----------|-------------|
|                      |                  | Wild-type | <i>sts1</i> |
| <i>sts1-1/sts1-1</i> | Present          | 6         | 0           |
| <i>sts1-1/sts1-1</i> | Absent           | 0         | 5           |
| +/ <i>sts1-1</i>     | Present          | 8         | 0           |
| +/ <i>sts1-1</i>     | Absent           | 8         | 0           |
| +/+                  | Present          | 9         | 0           |
| +/+                  | Absent           | 3         | 0           |

**Supplemental Figure 3** *sts1* expression in male florets

(A) Orientation and direction of sections

(B) Adjacent serial sections through an entire floret ordered from abaxial to adaxial (1-11) probed with anti-*sts1* probe. Note the lack of expression in the adaxial region (floret shown in (A) is at an older stage than the sections). Scale bar = 100 $\mu$ m.

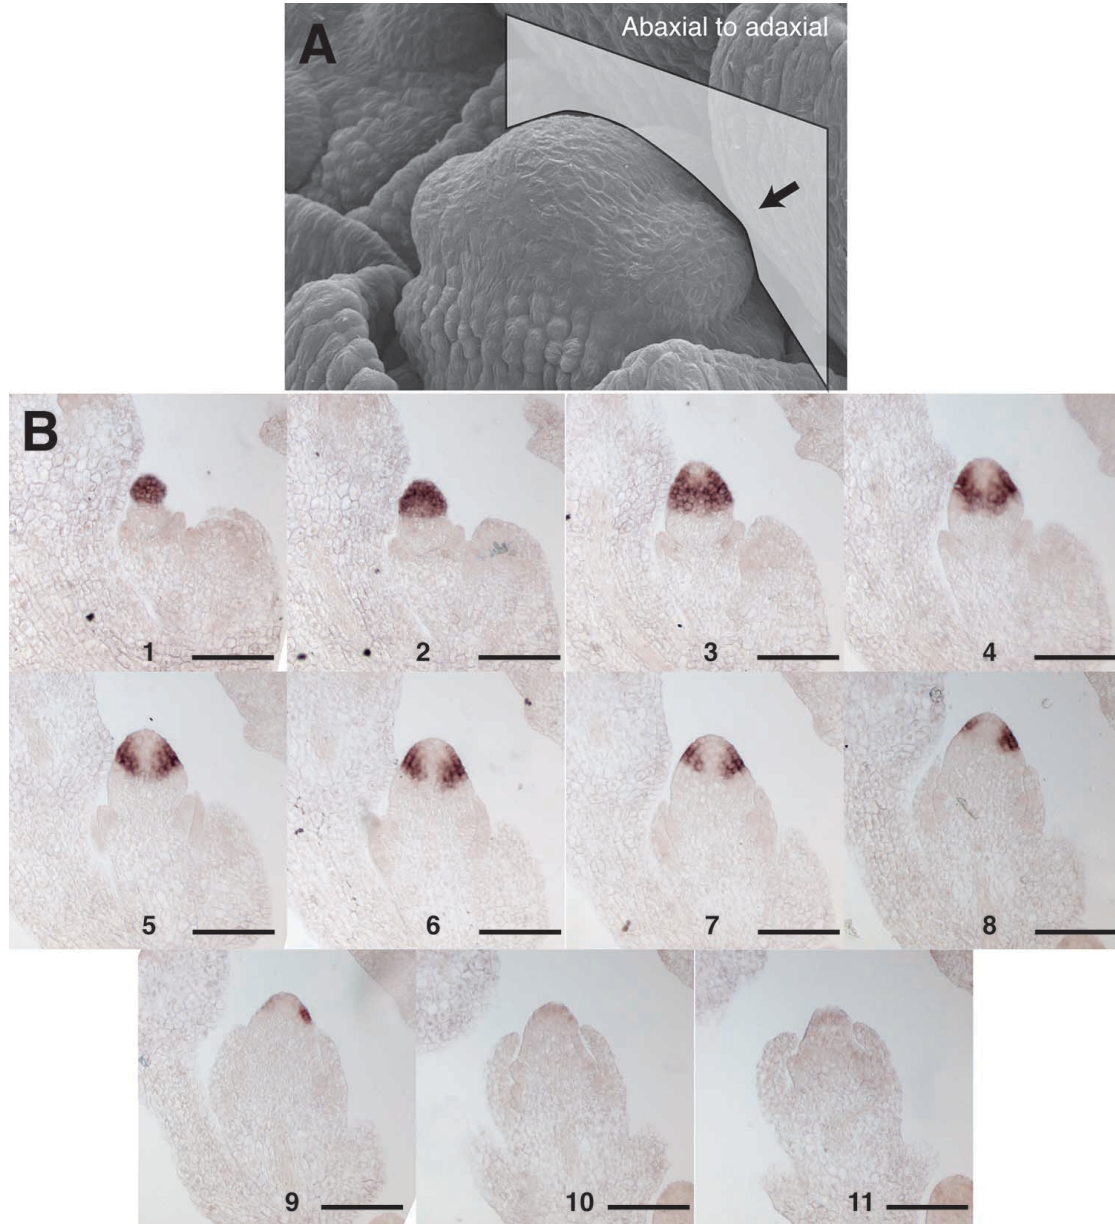

**Supplemental Figure 4** *si1* expression in male florets

(A) Orientation and direction of sections

(B) Adjacent serial sections through half of a floret ordered from medial to lateral (1-6) probed with anti-*si1* probe. Two florets from successive nodes are shown in each panel. Sections are ordered from abaxial to adaxial. Note the lack of expression in the adaxial region (floret shown in (A) is at an older stage than the sections). Scale bar = 100 $\mu$ m.

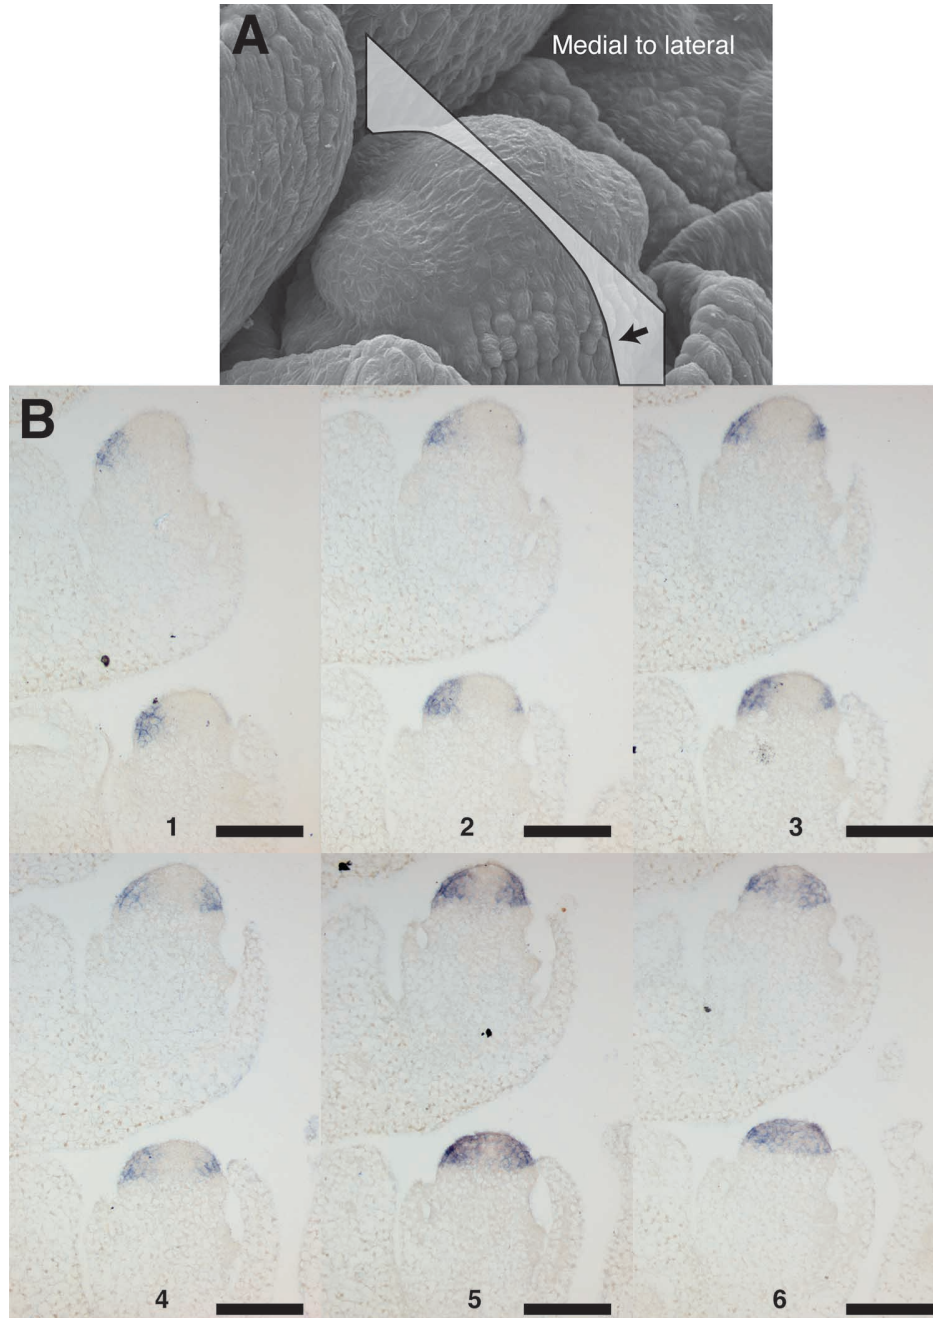

**Supplemental Figure 5** Expression analysis of *Zmm18/29* RNAi knockdown lines. Expression levels of *Zmm18/29* (assayed together with primers that recognize both paralogs) and *sts1* were determined by RT-qPCR using cDNA from florets of tassels just prior to emergence from vegetative leaves. *sts1* levels were assayed as a control for specificity of RNAi to *Zmm18/29*. The slight but significant down-regulation of *sts1* in line #10 could be due to either non-specific silencing of this paralogous gene, or positive regulation of *sts1* by *Zmm18/29*. Error bars represent standard deviation from the mean, and \* indicate a significant difference ( $P \leq 0.05$ ) from wild-type (lacking transgene) expression levels at the same stage.

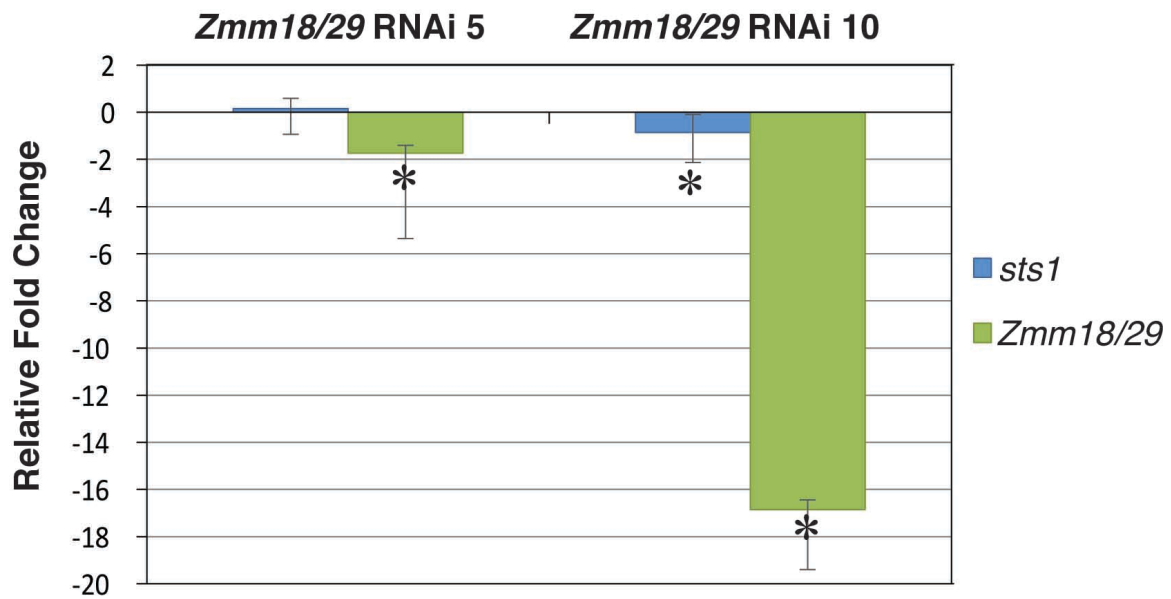



**Supplemental Figure 6** Partial stamen identity in *gt1 sts1* double mutants (A) and (B) *sts1-1 gt1* double mutants have organs with partial stamen identity. Some organs are mosaic with both stamen and carpel identity as evidenced by anthers tipped by silk tissue (arrows), while others are deformed stamens (arrowhead). Scale bar is 2.0 mm.

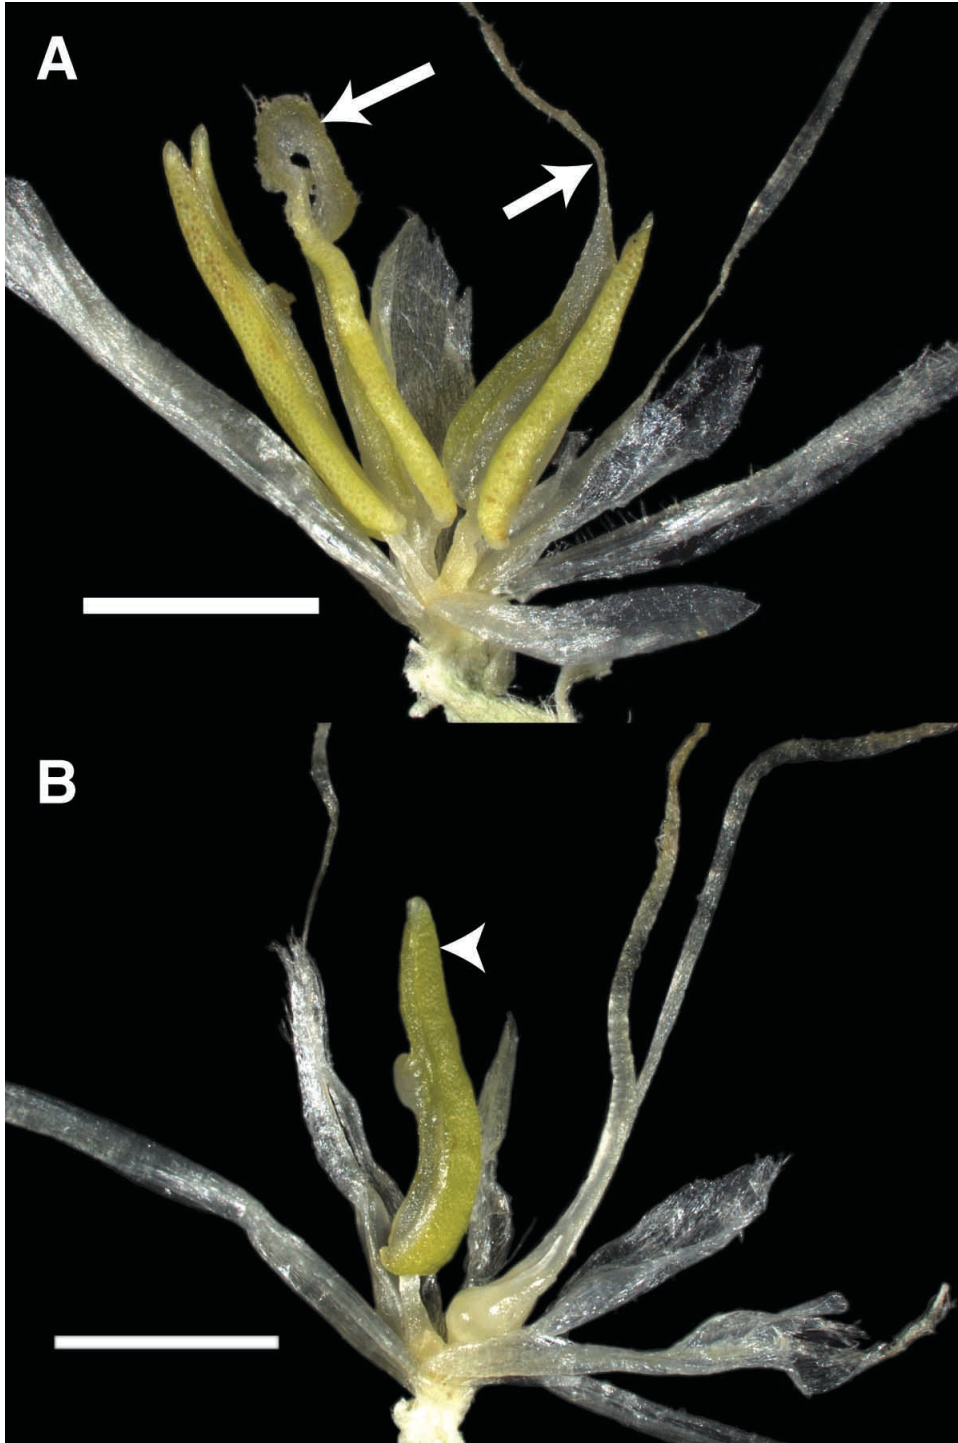

**Supplemental Table 1.**

| <b>Primer Name</b>                                                             | <b>Primer Sequence</b>                                               |
|--------------------------------------------------------------------------------|----------------------------------------------------------------------|
| <b>Genotyping primers for <i>sts1-1</i>, <i>gt1-1</i>, and <i>si1-mum2</i></b> |                                                                      |
| Sts1-CAPS-For                                                                  | TCCGATAGGGGAACAGACAG                                                 |
| Sts1-CAPS-Rev                                                                  | ATCAGGTCTTTGGGTTGCAG                                                 |
| Sts1-CAPS-Rev1                                                                 | GCATCCAGCAGTCTAATTGT                                                 |
| Gt1-CAPS-For                                                                   | AGGTGGCCGTCTGGTTCCAGAA                                               |
| Gt1-CAPS-Rev                                                                   | TGGTGCCTCACCGTCGAGAAC                                                |
| Si1-For                                                                        | GTGCTGCTGTGCTCATCAAT                                                 |
| Si1-Rev                                                                        | TAGGTATCAGTCTGCGTGCTG                                                |
| Mu-TIR6                                                                        | AGAGAAGCCAACGCCAWCGCCTCYATTTTCGTC                                    |
| <b>Zmm19/29 RNAi Vector Construction Primers</b>                               |                                                                      |
| Zmm18/ZMM29-5'Spel-For                                                         | GCGACTAGTTAAAGATCCACACCACTTGAGC                                      |
| Zmm18/ZMM29-5'-Rev                                                             | CTACTCGTCTACTGCGTTCTCCACTCCCAA                                       |
| Zmm18/ZMM29-3'-For                                                             | AGAACGCAGTAGACGAGTAGCTACAGCCTG                                       |
| Zmm18/ZMM29-3'Xmal-Rev                                                         | GCGCCCGGGAGCCCAGCAAAGTCAAAGAGA                                       |
| Zmm18/ZMM29-5'AscI-For                                                         | GCGGGCGCGCCTAAAGATCCACACCACTTGAGC                                    |
| Zmm18/ZMM29-3'AvrII-Rev                                                        | GCGCCTAGGAGCCCAGCAAAGTCAAAGAGA                                       |
| <b>Primers and probes for qRT-PCR</b>                                          |                                                                      |
| Sts1-RTPCR-For                                                                 | ATAATGGACTGACGAACCTGAATG                                             |
| Sts1-RTPCR- Rev                                                                | GCGATATCTTGCTGGTGGAGT                                                |
| Si1-RTPCR- For                                                                 | CACAGAGATTAGGCAAAGGATGG                                              |
| Si1-RTPCR-Rev                                                                  | AGTCTGCGTGCTGATCACATG                                                |
| Zmm18/29-RTPCR-For                                                             | ATGCAGATTCAGCTCAGGCAT                                                |
| Zmm18/29-RTPCR-Rev                                                             | CAGTAGTCCATCTGCTTCTCGC                                               |
| $\alpha$ Tubulin-RTPCR-For                                                     | GAGCATGGCATTTCAGGCTG                                                 |
| $\alpha$ Tubulin-RTPCR-Rev                                                     | CAAGGTCAACAAAAACAGCACG                                               |
| Sts1-Probe                                                                     | 6FAM-AAGGCCAGCAATTTGTTCTCGTCTTCCAT-TAMRA                             |
| Si1-Probe                                                                      | 6FAM-ATCTGGACAGTCTGGACTTCGACGAGCT-TAMRA                              |
| Zmm18/29-Probe                                                                 | 6FAM-ATGTTGGTCTGCCATTCTGGAGGC-TAMRA                                  |
| $\alpha$ Tubulin-Probe                                                         | 6FAM-CAGATGCCCGGTGACAAGACCATTG-TAMRA                                 |
| <b>Primers for creation of <i>sts1-YFP</i></b>                                 |                                                                      |
| sts1_attB4                                                                     | GGGGACAACCTTTGTATAGAAAAGTTGTGCCAACGCAGCTATCTCTA                      |
| sts1_attB1(R)                                                                  | GGGGACTGCTTTTTGTACAAACTTGCATTGTTCTCCTGCAAGTTGG                       |
| sts1_attB2                                                                     | GGGGACAGCTTCTTGTACAAAGTGGGATAGACTGCTGGATGCCCTCG                      |
| sts1_attB3(R)                                                                  | GGGGACAACCTTTGTATAATAAAGTTGAGACGACGGAACACCAAATC                      |
| YFP_attB1                                                                      | GGGGACAAGTTTGTACAAAAAAGCAGGCTTAGGCCGGCCTGGAGGTGGAGGTGGAGC<br>TGTGAGC |
| YFP_attB2(R)                                                                   | GGGGACCACTTTGTACAAGAAAGCTGGGTGGGCCCCAGCGGCCGCAGCAGCACCAGC<br>AGGATC  |

The *att* sites required for Gateway cloning are underlined. Nucleotides inserted to maintain the reading frame are bolded
